# Supplementary material for: Early Cellular Responses of Prostate Carcinoma Cells to Sepantronium Bromide (YM155) Involve Suppression of mTORC1 by AMPK
Source: PubMed Central journal article supplement (PMC6687778; doi:10.1038/s41598-019-47573-y), 2019-08-08
Supplement: 41598_2019_47573_MOESM1_ESM.pdf [file 41598_2019_47573_MOESM1_ESM.pdf]

## Supplementary Information

### Early Cellular Responses of Prostate Carcinoma Cells to Sepantronium Bromide (YM155) Involve Suppression of mTORC1 by AMPK

David Danielpour<sup>1,2,3,\*</sup>, Zhaofeng Gao<sup>7#</sup>, Patrick M. Zmina<sup>1#</sup>, Eswar Shankar<sup>1#</sup>, Benjamin C. Shultes<sup>1,4</sup>, Raul Jobava<sup>7</sup>, Scott M. Welford<sup>5,6</sup>, and Maria Hatzoglou<sup>7</sup>

Case Comprehensive Cancer Center Research Laboratories, The Division of General Medical Sciences-Oncology<sup>1</sup>, Department of Pharmacology<sup>2</sup>, Department of Biochemistry<sup>4</sup>, Department of Radiation Oncology<sup>5</sup>, and Department of Genetics and Genomic Sciences<sup>7</sup>, Case Western Reserve University, Cleveland, OH 44106.

Department of Urology<sup>3</sup>, University Hospitals of Cleveland, Cleveland, OH 44106

Department of Radiation Oncology<sup>6</sup>, University of Miami, FL 33136

**Running title:** YM155 Suppresses mTORC1 via AMPK

**#Authors contributed equally**

# Supplementary Figure S1

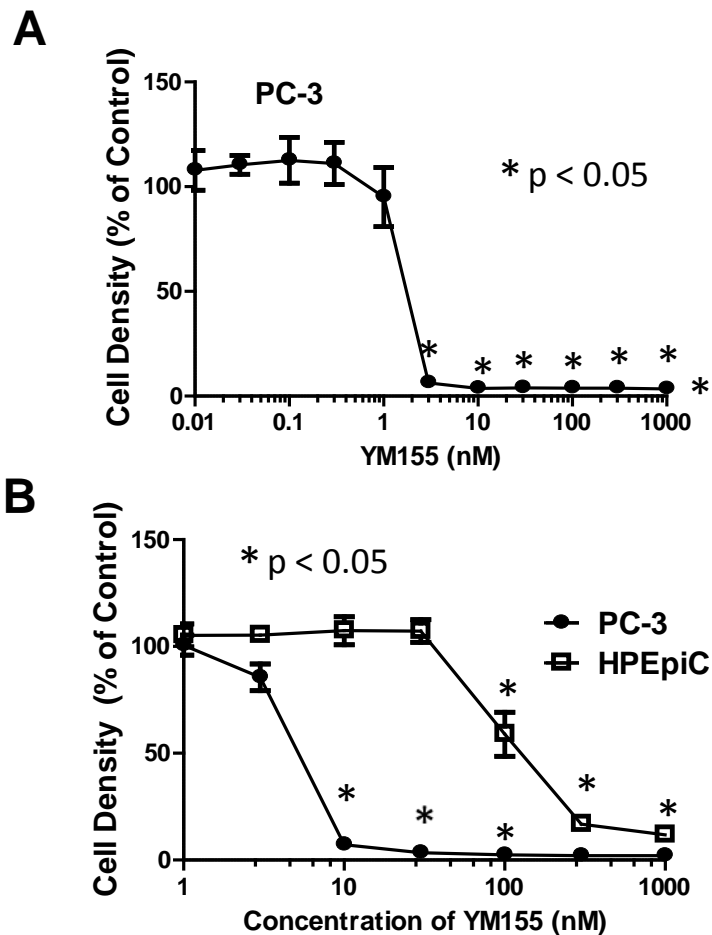

## Supplementary Figure S1

Dose-dependent changes PC-3 and HEpiC cell density following 72 h treatment with various doses of YM155. A) PC-3 cells were plated in 24-well dishes at 5,000 cells/well/0.5 ml, the next day treated with YM155 and 72 h later cell growth was assessed with a crystal violet assay as described in the materials and methods. B) A side-by side comparison between the cytotoxic responses of YM155 on confluent cultures of PC-3 and HEpiC cells after 72 h drug addition, as assayed by in A.

# Supplementary Figure S2

A.

Effect of YM155 on cell cycle in PC-3 cells after 24 hours

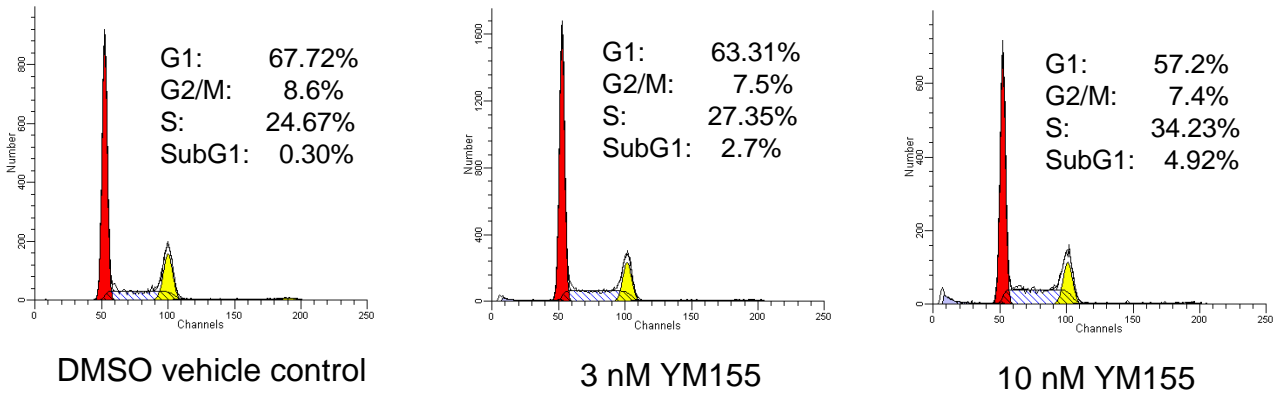

Effect of YM155 on cell cycle in PC-3 cells

B.

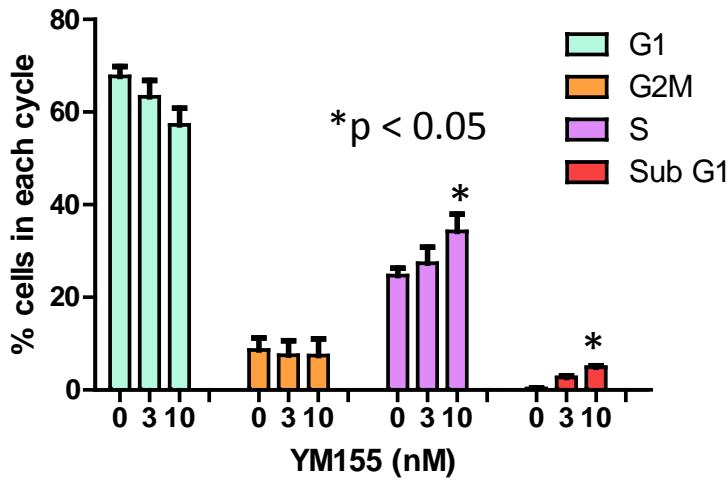

Cell cycle analysis was performed on PC-3 cells following treatment with vehicle or YM155 for 24 h. Cells were fixed with 90% methanol, stained with propidium iodide and analyzed by flow cytometry as described previously (Song et. al., EMBO, 25: 58-69, 2006). A) the y-axis represents the number of cells and the x-axis is the DNA content in per cell. B) Averages of the various phases of the cell cycle following YM155 treatment.

## Supplementary Figure S3

**A.**

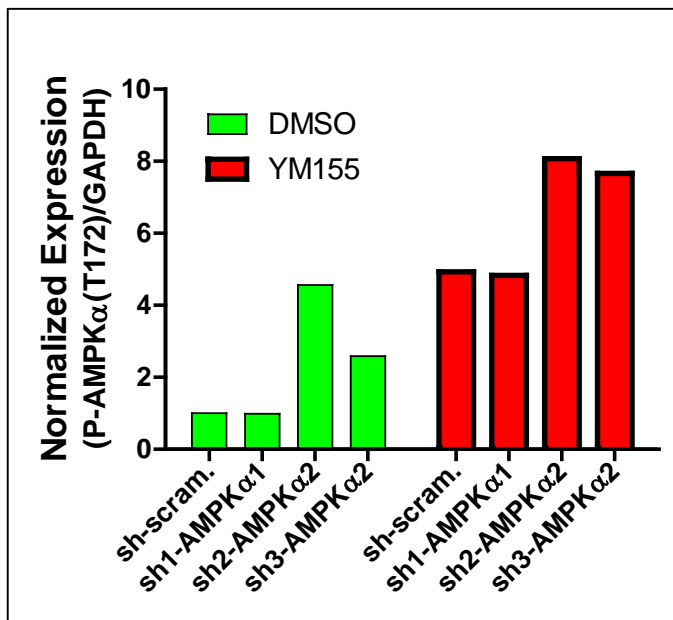

**B.**

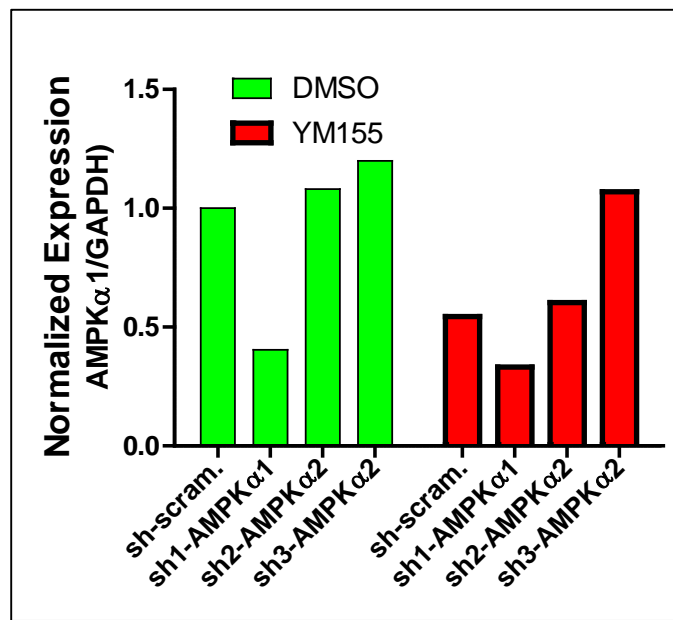

**Supplementary Figure S2.** Densitometry of Figure 9C by the Image J software for semi-quantitative analysis of P-AMPK $\alpha$  (T172) (A) and total AMPK $\alpha$  (B). Data are normalized to GAPDH loading control and expressed as normalized expression relative to untreated scrambled control.

## Supplementary Figure S4

A.

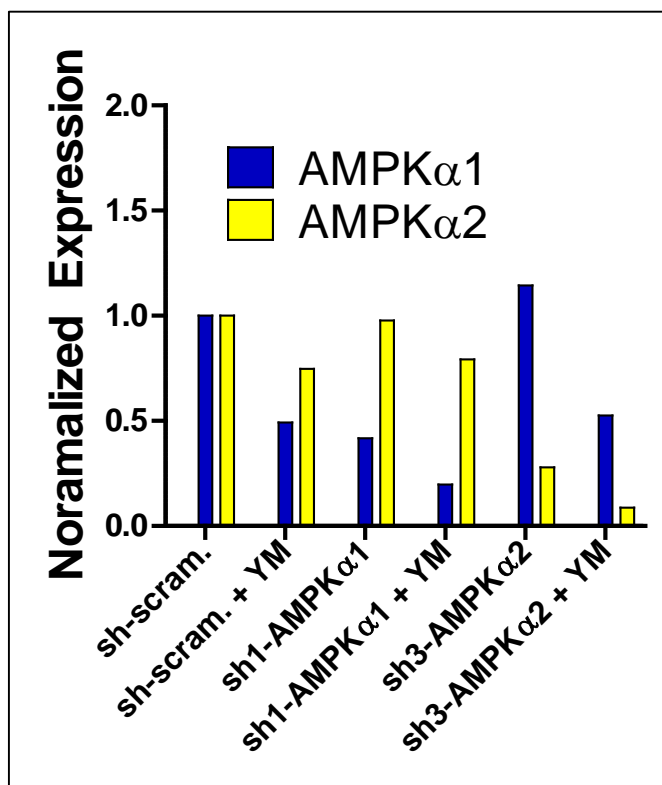

B.

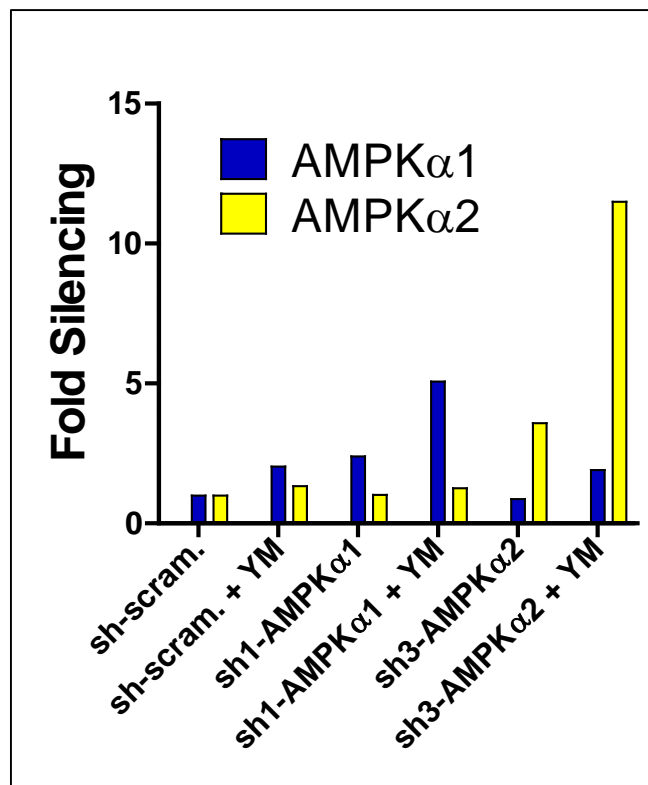

**Supplementary Figure S3.** Densitometry of Figure 9D by the Image J software for semi-quantitative analysis of AMPK $\alpha$ 1 and AMPK $\alpha$ 2. Data are normalized to  $\beta$ -actin loading control and expressed as normalized expression relative to untreated scrambled control (A), and fold induction over the scrambled untreated control (B).

## Supplementary Figure S5

A.

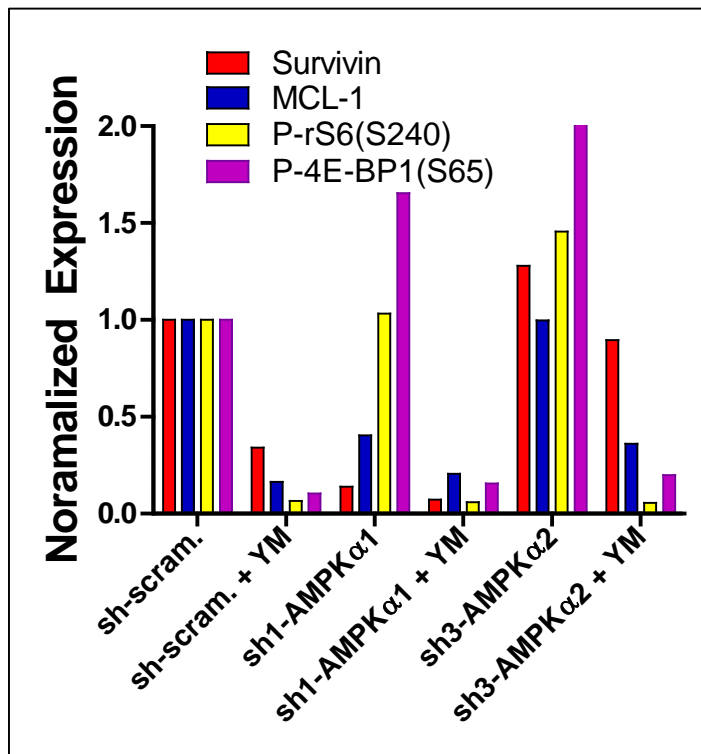

B.

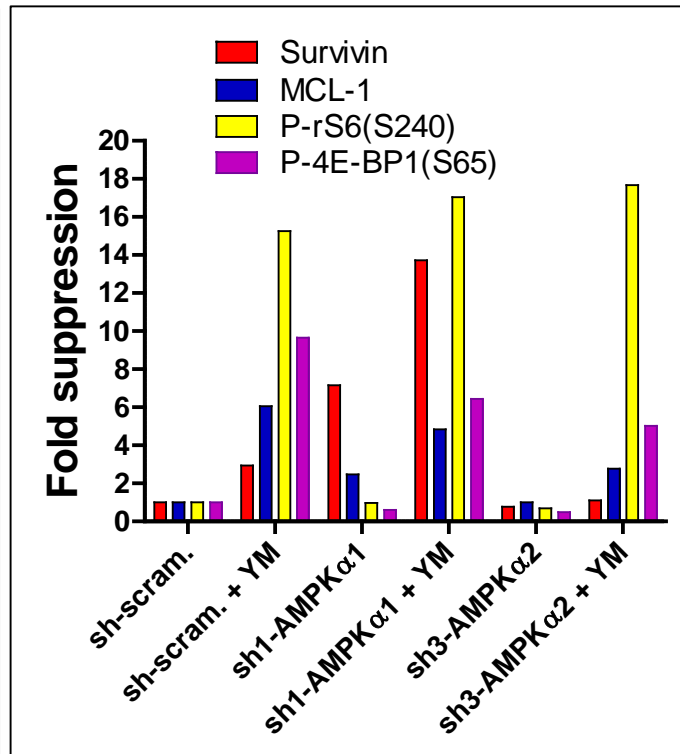

**Supplementary Figure S4.** Densitometry of Figures 9D and 9E by the Image J software for semi-quantitative analysis of Survivin, Mcl-1, P-rS6(240) and P-4E-BP1(S65). Data are normalized to their respective loading controls and expressed as normalized expression relative to untreated scrambled control (A), and fold induction over the scrambled untreated control (B).

# Supplementary Figure S6

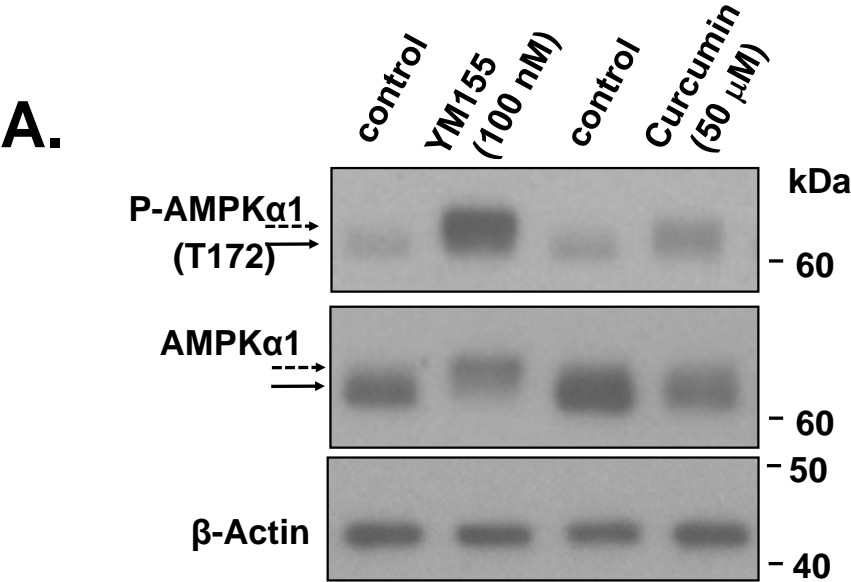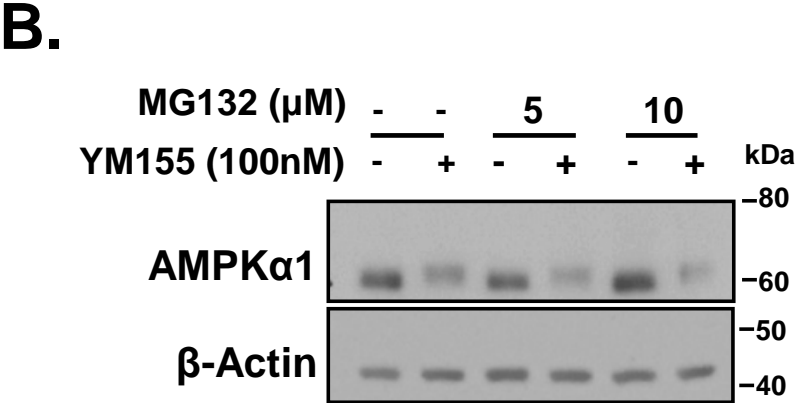

**Supplementary Figure S5.** Comparative effects of YM155 and Curcumin on total AMPK $\alpha$ 1 and phospho-AMPK $\alpha$  levels in PC-3 cells after 4 hours of treatment, as assessed by Western analysis. **B)** Effect of MG132 on YM155 (4 h)-mediated loss of AMPK $\alpha$ 1 in PC-3 cells was assessed by Western blot. Results shown are representative of 2 to 3 independent experiments.

# Supplementary Figure S7

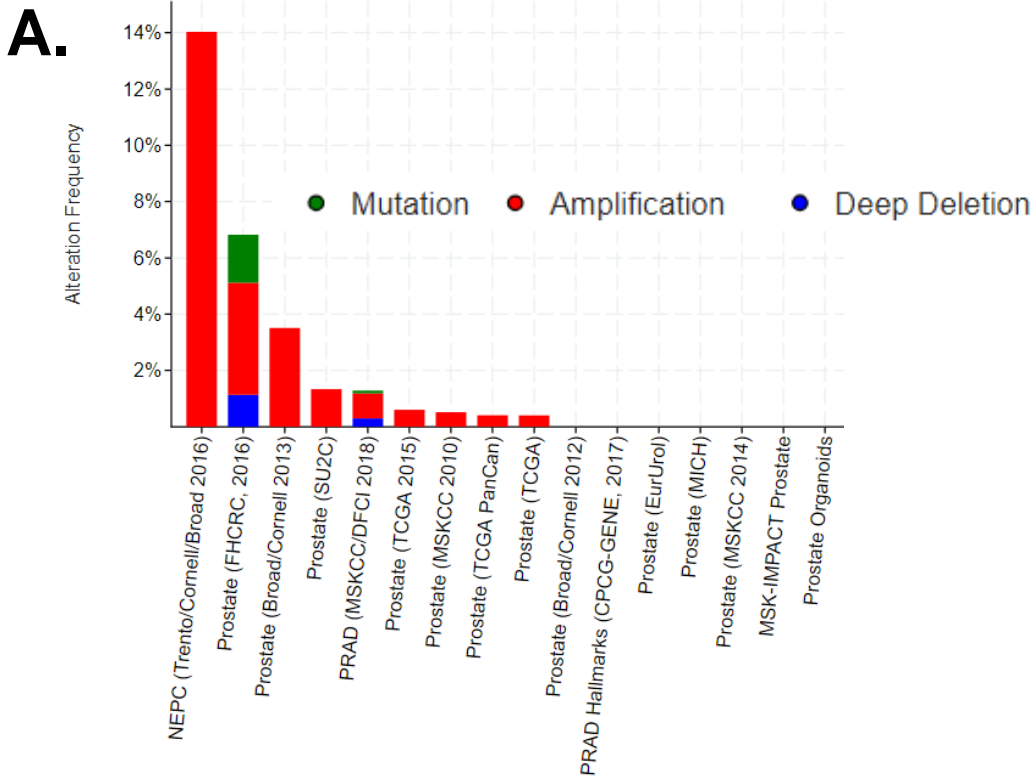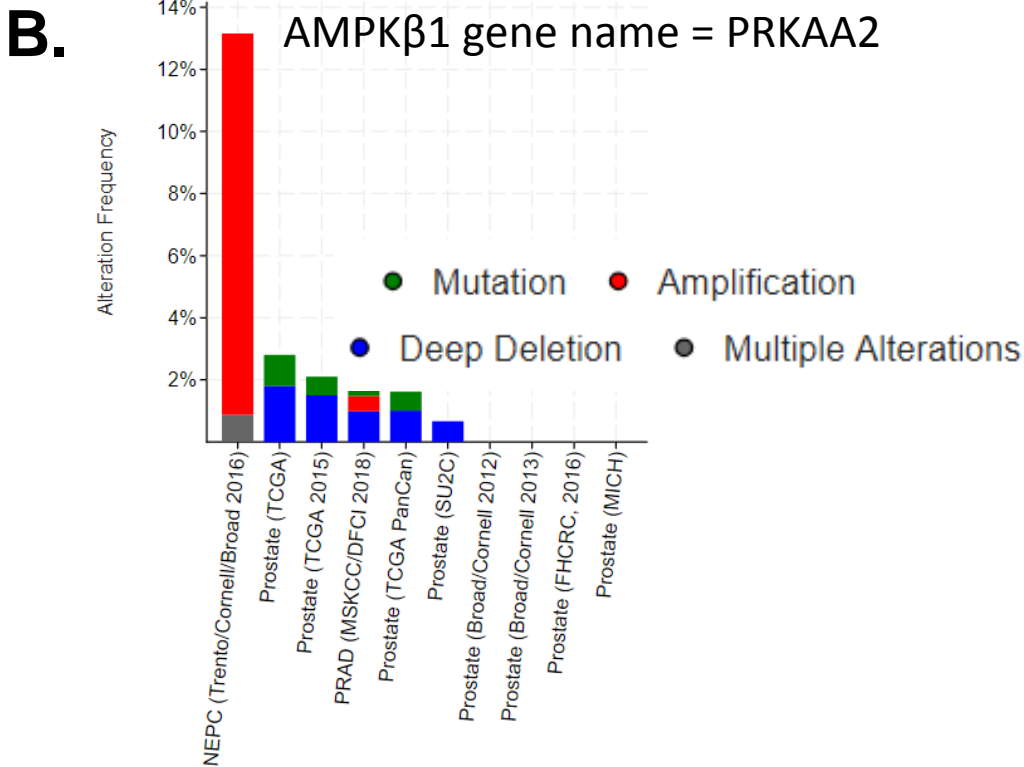

**Supplementary Figure S6.** Alterations in AMPK $\alpha$ 1 (**A**) and AMPK $\alpha$ 2 (**B**) found in the cBioportal (<http://cbioportal.org>) database support that AMPK $\alpha$ 1 and AMPK $\alpha$ 2 are significantly amplified in neuroendocrine prostate carcinomas.



# Supplementary Figure S8

A.

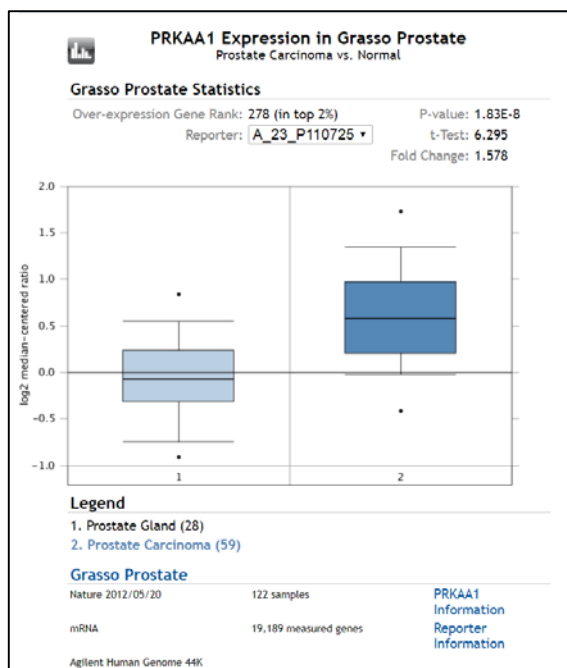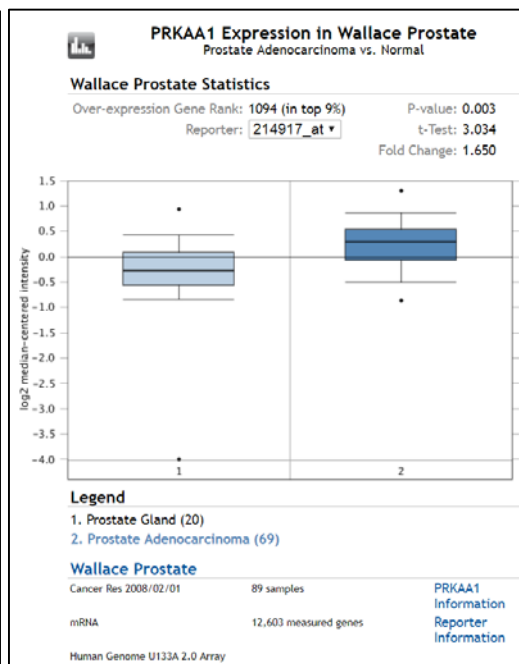

B.

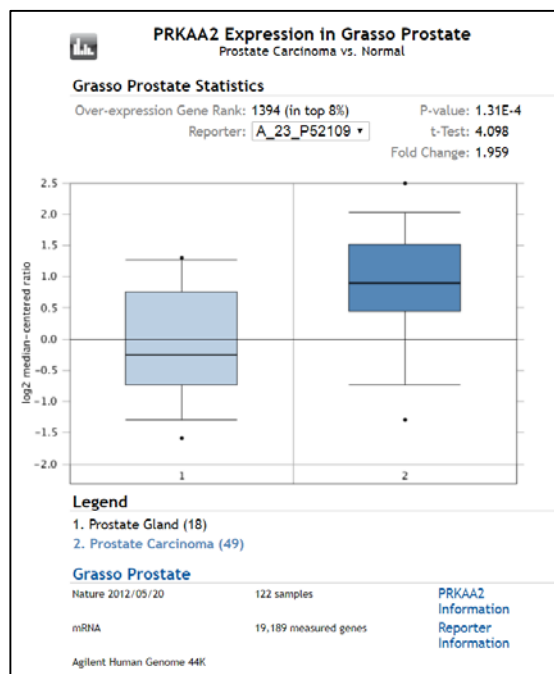

**Supplementary Figure S7.** Alterations in the expression of AMPK $\alpha$ 1 (A) and AMPK $\alpha$ 2 (B) found in studies in Oncomine database (<https://www.oncomine.org/resource/login.html>) support that AMPK $\alpha$ 1 are AMPK $\alpha$ 2 are significantly overexpressed in prostate carcinomas.
